# Supplementary material for: Tuning the work function of the silicene/4 × 4 Ag(111) surface
Source: Royal Society of Chemistry journal article supplement (doi:10.1039/c9cp00424f), 2019-01-01
Supplement: c9cp00424f1.pdf [file c9cp00424f1.pdf]

## Tuning the work function of the silicene-4x4 Ag(111) surface

Patrick D. Taylor,<sup>1‡</sup> Dale A. Osborne,<sup>1‡</sup> Sherif Abdulkader Tawifk,<sup>1</sup> Tetsuya Morishita,<sup>2</sup>  
Michelle J.S. Spencer<sup>1\*</sup>

<sup>1</sup>School of Science, RMIT University, GPO Box 2476 Melbourne, Victoria 3001 Australia.

<sup>2</sup>Research Center for Computational Design of Advanced Functional Materials (CD-FMat), National Institute of Advanced Industrial Science and Technology (AIST), 1-1-1 Umezono, Tsukuba 305-8568, Japan.

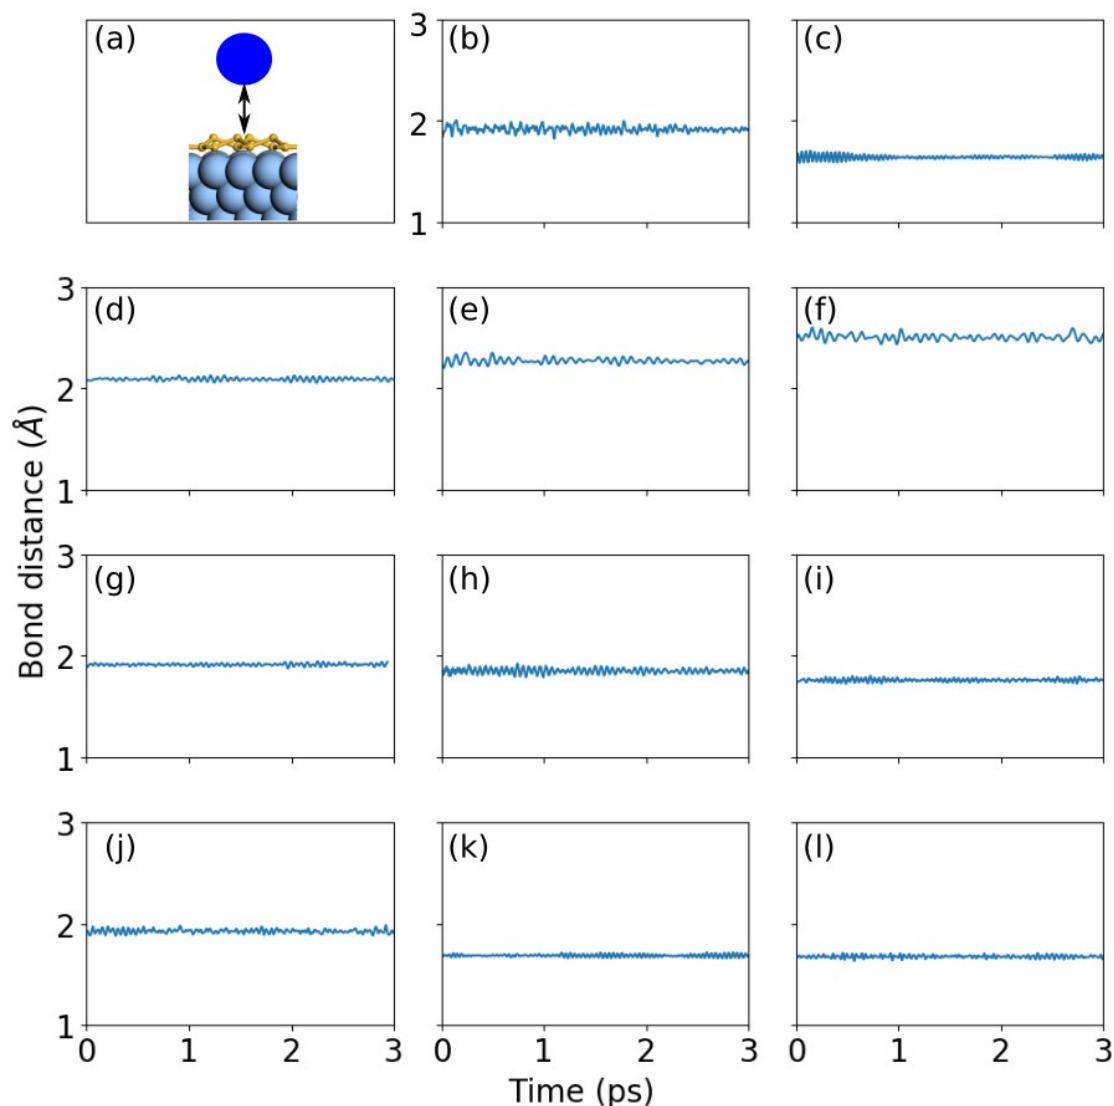

**Figure S1:** The bond distance between the Si atom and the covalently bonded atom in the respective functional group. A schematic of the structure is displayed in (a). The calculated variation in bond distances are for (b) the surface functionalised with (b) six phenyl ( $C_6H_5$ ) groups, (c) six fluorine (F) atoms, (d) six chlorine (Cl) atoms, (e) six bromine (Br) atoms, (f) six iodine (I) atoms, (g) six methyl ( $CH_3$ ) groups, (h) six cyano (CN) groups, (i) six amino ( $NH_2$ ) groups, (j) six ethylmethylamine ( $(CH_2)_2NHCH_3$ ) groups, (k) six hydroxyl (OH) groups and (l) six methoxy ( $OCH_3$ ) groups.

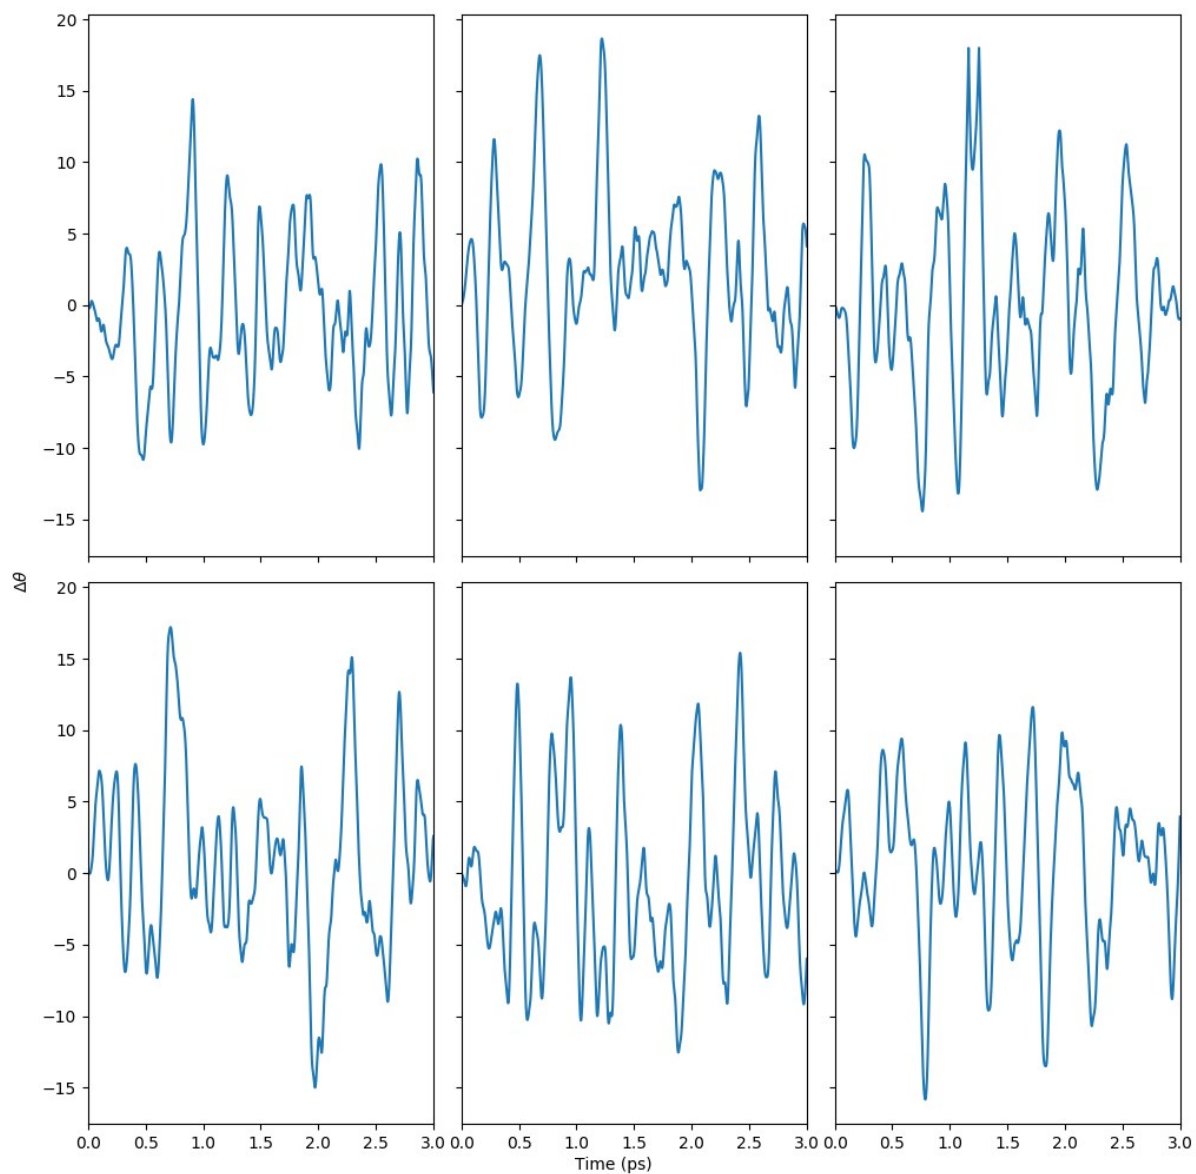

**Figure S2:** The variation in the horizontal orientation, in degrees, for each of the 6 phenyl groups in the structure in Fig. 2(b) as a function of time. The unit of the variation in the angles,  $\Delta\theta$ , is in degrees.

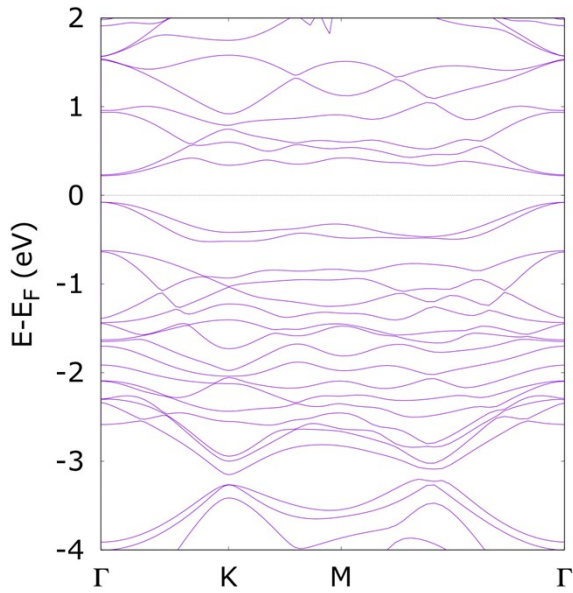

**Figure S3:** The electronic band structure for the free-standing silicene monolayer, with the Si atoms frozen to coordinates position.

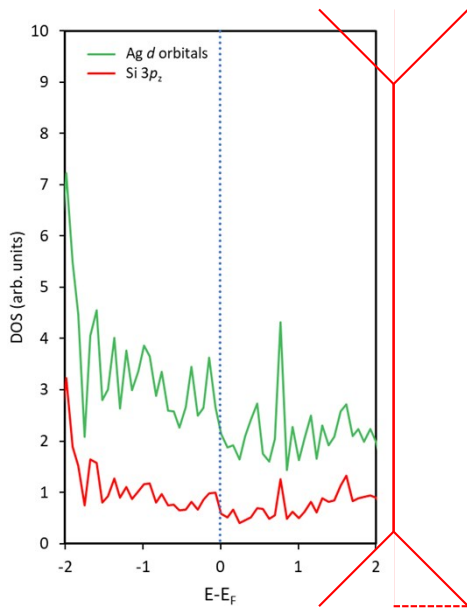

**Figure S4:** Calculated PDOS for the most stable geometry of the pristine Si/Ag(111) showing a zoomed in region around the fermi level.

Comment [SA]: Label: Ag 4d
